# Supplementary material for: swSpAMM: optimizing large-scale sparse approximate matrix multiplication on Sunway Taihulight
Source: Springer Nature journal article supplement (doi:10.1007/s11704-022-1749-6), 2022-11-07
Supplement: 11704_2022_1749_MOESM1_ESM.pdf [file 11704_2022_1749_MOESM1_ESM.pdf]

# SpAMM: Optimizing Large-Scale Sparse Approximate Matrix Multiplication on Sunway Taihulight

Xiaoyan LIU, Yi LIU, Bohong YIN, Hailong YANG,  
Zhongzhi LUAN, Depei QIAN

Frontiers of Computer Science, DOI: [10.1007/s11704-022-1749-6](https://doi.org/10.1007/s11704-022-1749-6)

# Problems & Ideas

- Problems of SpAMM on Sunway TaihuLight:
  - No existing work learning about SpAMM on Sunway TaihuLight.
  - Needs hardware-specific optimization.
  - Needs careful design to improve intra-node and inter-node parallelism.
- Ideas: Propose swSpAMM, an optimized SpAMM algorithm for large-scale decay matrix multiplication tailored for Sunway Taihulight supercomputer.

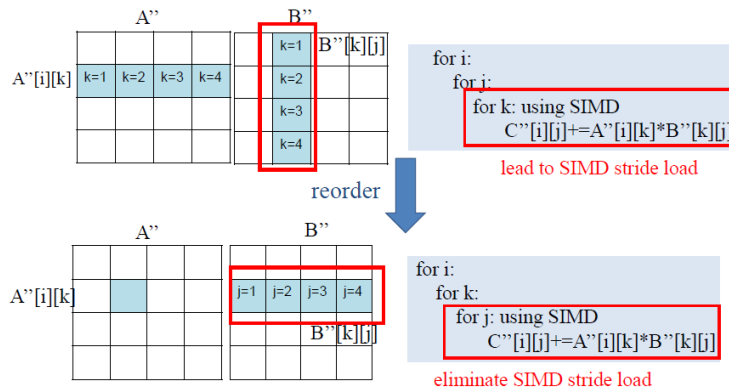

hardware-specific optimization

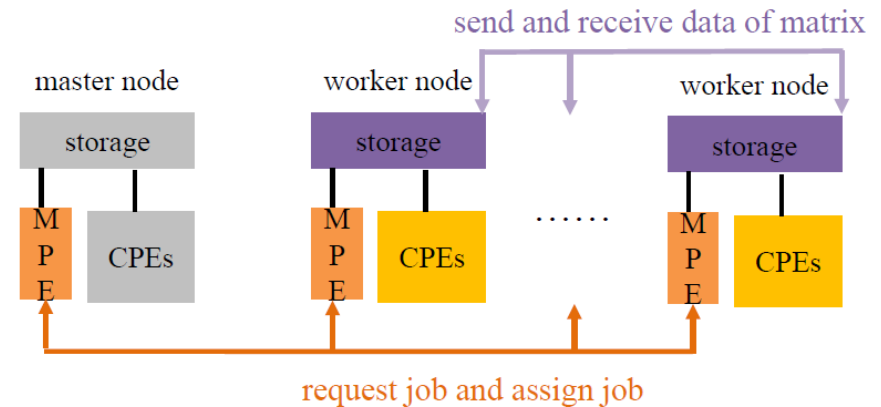

Scheduler for swSpAMM

# Main Contributions

- Contributions:
  - We propose a unique task scheduling strategy to increase the parallel efficiency on a single node (one CG). We also adopt a fine-grained data layout transformation as well as architecture-specific optimizations for better performance;
  - We propose a computation scheduling strategy based on the Master-Worker model to increase parallel efficiency and achieve load balance. We design a large-scale communication scheme with a memory pool to optimize the storage usage and parallelization.

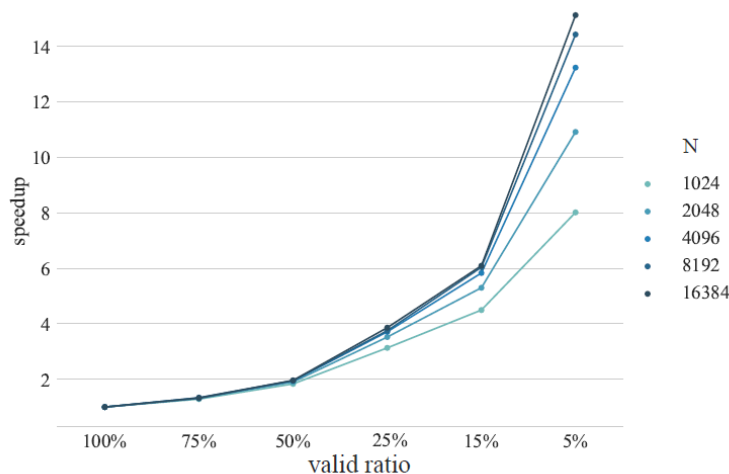

The speedup of swSpAMM with algebraic decay compared with xMath.

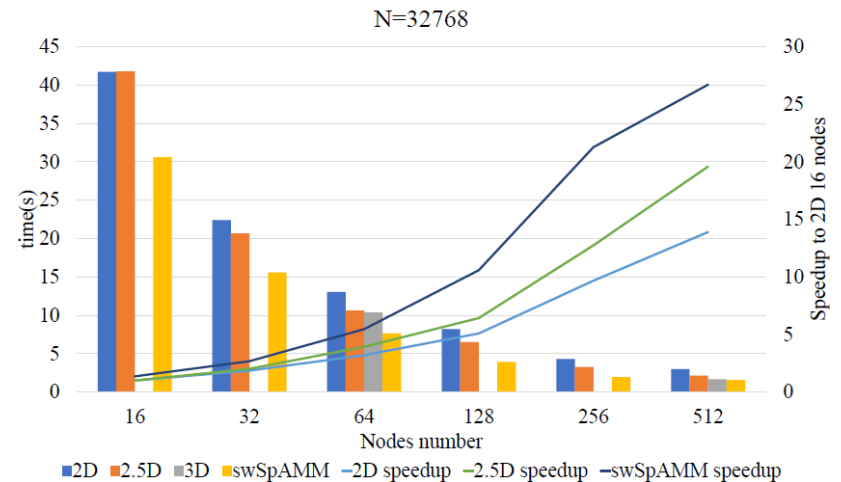

The performance comparison with existing large-scale GEMM algorithm when matrix size N=32768.
